1 **Radula diversification promotes ecomorph divergence in an adaptive radiation**  
2 **of freshwater snails**

3  
4  
5 Leon Hilgers<sup>1,2,3\*</sup>, Stefanie Hartmann<sup>1</sup>, Jobst Pfaender<sup>4</sup>, Nora Lentge-Maaß<sup>2,5</sup>,  
6 Thomas von Rintelen<sup>2,‡</sup>, Michael Hofreiter<sup>1,‡</sup>

7  
8 \* = Corresponding Author

9 ‡ = Shared senior authors

10 1 = Institute of Biochemistry and Biology, University of Potsdam, Potsdam,  
11 Germany

12 2= Museum für Naturkunde Berlin, Leibniz Institute for Evolution and Biodiversity  
13 Science, Berlin, Germany

14 3 = Zoological Research Museum Alexander Koenig, Leibniz Institute for Animal  
15 Biodiversity, Bonn, Germany

16 4 = Naturkundemuseum Potsdam, Potsdam, Germany

17 5 = Centrum für Naturkunde, Hamburg, Germany

18 **Radula diversification promotes ecomorph divergence in an adaptive radiation**  
19 **of freshwater snails**

20  
21 Leon Hilgers, Stefanie Hartmann, Jobst Pfaender, Nora Lentge-Maaß, Thomas von  
22 Rintelen, Michael Hofreiter

23

24 **Abstract**

25 Adaptive diversification of complex traits plays a pivotal role for the evolution of organismal  
26 diversity. However, the underlying molecular mechanisms remain largely elusive. In the  
27 freshwater snail genus *Tylomelania*, adaptive radiations were likely promoted by trophic  
28 specialization via diversification of their key foraging organ, the radula. To investigate the  
29 molecular basis of radula diversification and its contribution to lineage divergence, we use  
30 pooled tissue-specific transcriptomes of two sympatric *Tylomelania sarasinorum* ecomorphs.  
31 We show that divergence in both gene expression and coding sequences is stronger between  
32 radula transcriptomes compared to mantle and foot transcriptomes. These findings support the  
33 hypothesis that diversifying selection on the radula is driving speciation in *Tylomelania*  
34 radiations. We also identify several candidate genes for radula divergence. Putative homologs  
35 of some candidates (*hh*, *arx*, *gbb*) also contributed to trophic specialization in cichlids and  
36 Darwin's finches, indicating that some molecular pathways may be especially prone to adaptive  
37 diversification.

## 38 Main

39 Adaptive radiations provide extreme examples of rapid phenotypic and ecological  
40 diversification and therefore feature prominently among model systems for adaptation and  
41 speciation<sup>1–6</sup>. In many adaptive radiations, lineage divergence is promoted by diversification of  
42 a few traits, like foraging organs, which acted as key adaptive traits in several radiations<sup>3,7–13</sup>.  
43 Understanding the genetic bases of key adaptive traits is essential because they shape  
44 evolutionary trajectories of diversifying lineages<sup>14,15</sup>. Although previous findings are likely  
45 biased towards few genes of large effect<sup>2,16</sup>, they also indicate that polygenic selection<sup>17–19</sup>,  
46 adaptive introgression<sup>20–24</sup>, and regulatory evolution<sup>18,21,25,26</sup> promote diversification in adaptive  
47 radiations<sup>17–19</sup>. However, much remains to be discovered about the genetic basis of adaptive  
48 traits, the molecular evolution underlying their diversification, and their contribution to  
49 speciation<sup>2,27</sup>. Particularly, our understanding of gene expression divergence and its  
50 contribution to speciation is still in its infancy<sup>28,29</sup>. Here we investigate the genetic basis of  
51 diversification of the molluscan key foraging organ (the radula) and its role for lineage  
52 divergence in a radiation of freshwater snails, using two sympatric ecomorphs of *Tylomelania*  
53 *sarasinorum*<sup>30</sup>.

54 The genus *Tylomelania* is endemic to the central Indonesian island Sulawesi and underwent  
55 several radiations following colonizations of different lake systems<sup>31,32</sup>. Lacustrine species  
56 flocks occur across heterogeneous substrates and exhibit remarkable radula diversity (Figure  
57 1)<sup>33,34</sup>. In contrast, riverine clades occupy relatively homogenous substrates, have uniformly  
58 shaped radular teeth and include comparatively few species<sup>33,34</sup>. Additionally, similar radula  
59 morphologies likely evolved several times on similar substrates in different lakes<sup>31,32,34</sup>. Hence,  
60 it was hypothesized that divergent adaptation of the radula allowed efficient foraging on  
61 alternative substrates and promoted speciation in radiations of *Tylomelania*<sup>31,32</sup>.

62 In addition to interspecific variation, some species exhibit radula polymorphisms<sup>34</sup>. One such  
63 species is *Tylomelania sarasinorum*, which reportedly has a substrate-correlated radula  
64 polymorphism. Ecomorphs occur on rocks and logs in shallow waters of Lake Towuti (Figure

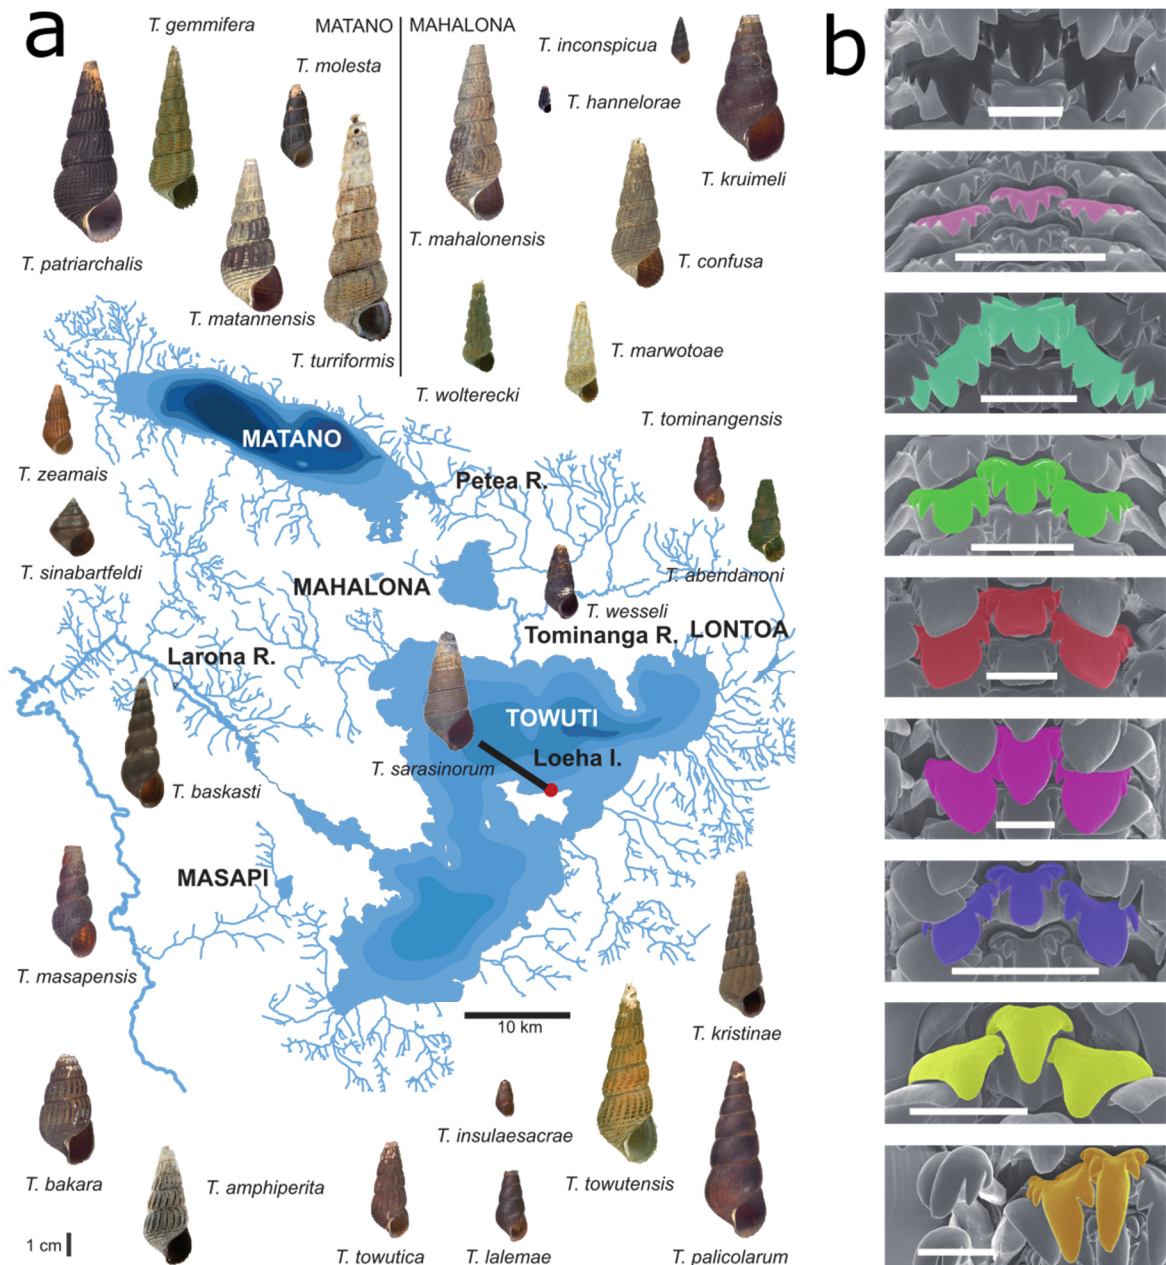

**Fig. 1: Diversity of the viviparous freshwater snail genus *Tylomelania* in the Malili Lakes System.** Species diversity in the Malili Lakes and surrounding rivers (a) is shown together with an overview of radula morphologies (b) (Scale bars = 0.1 mm). The sampling site of *T. sarasinorum* specimens at Loeha Island is indicated by a red dot. It was hypothesized that ecomorphs of *T. sarasinorum* modified their radula in adaption to different microhabitats, i.e. submerged logs and rocks. Modified with permission from <sup>31</sup> and <sup>32</sup>.

65 1, 2a)<sup>34</sup>, but cannot be distinguished based on mitochondrial markers<sup>31,35</sup>. Given the radula's  
 66 hypothesized role as key adaptive trait in this radiation, *T. sarasinorum* ecomorphs may  
 67 represent diverging lineages that evolved different radula morphologies in adaptation to  
 68 alternative foraging substrates (Figure 2a). Further, the continuous secretion of the radula,

69 which consists of numerous rows of chitinous teeth (Suppl. figure 1)<sup>36</sup>, enables drastic  
70 phenotypic plasticity in some snails<sup>37,38</sup>, showing that tooth shapes can be altered during radula  
71 secretion. However, such phenotypic plasticity does not seem to occur in *T. sarasinorum*. In  
72 fact, both ecomorphs can be found across both substrates, yet changes in radula morphology  
73 across teeth rows have never been observed in ~500 specimens (Suppl. table 1).  
74 Here we combine morphological analyses of the radula and the shell with tissue-specific  
75 transcriptomes to measure morphological and genetic divergence of sympatric *T. sarasinorum*  
76 ecomorphs. Our results indicate evolutionary divergence of ecomorphs. Divergence is most  
77 pronounced between radula transcriptomes, adding support to the hypothesis that the radula  
78 acts as key adaptive trait in *Tylomelania* radiations. Putative homologs of candidate genes for  
79 radula diversification also contributed to morphological diversification in vertebrate radiations.  
80 Our findings indicate that adaptive diversification can leave tissue-specific footprints of  
81 transcriptomic divergence, while morphological diversification in adaptive radiations may  
82 preferentially be achieved via a limited set of hotspot genes<sup>39,40</sup> within conserved signaling  
83 pathways.

84  
85

## 86 **Results and discussion**

### 87 **Geometric morphometrics corroborates a habitat-correlated radula** 88 **polymorphism**

89 Although a habitat-correlated radula polymorphism of *T. sarasinorum* together with slight  
90 differences in shell morphology and coloration (Figure 2a) have previously been reported<sup>41</sup>,  
91 these patterns have not been systematically analyzed so far. Hence, we investigated whether  
92 radula morphs are indeed morphologically distinct and whether frequencies of ecomorphs are  
93 habitat-correlated at Loeha Island. To this end, we quantified variation in radula and shell  
94 morphology of 19 and 18 specimens collected on wood and rock substrates, respectively (See  
95 suppl. figure 2 for an overview of radula morphologies). We found that the frequency of both

96 radula morphs differs significantly depending on the substrate from which they were collected  
97 (15/19 = 79% of specimens on rock are rock ecomorph; 18/18 = 100% of specimens on wood  
98 are wood ecomorph;  $p = 1.01 \times 10^{-6}$ ;  $\chi^2$  test). Furthermore, the first principal component (PC1)  
99 of radula shape, which accounts for 93.4% of the variance within the dataset, clearly separates  
100 *T. sarasinorum* ecomorphs ( $p < 0.001$ ). No overlap in PC1 exists between radula morphs, even  
101 when individuals collected on opposing substrates were included in the analysis (Figure 2b).  
102 In contrast, differences in shell shape are both more subtle and more gradual. Although  
103 significant differences in shell shape exist in PC2 ( $p < 0.001$ ), this axis summarizes a relatively

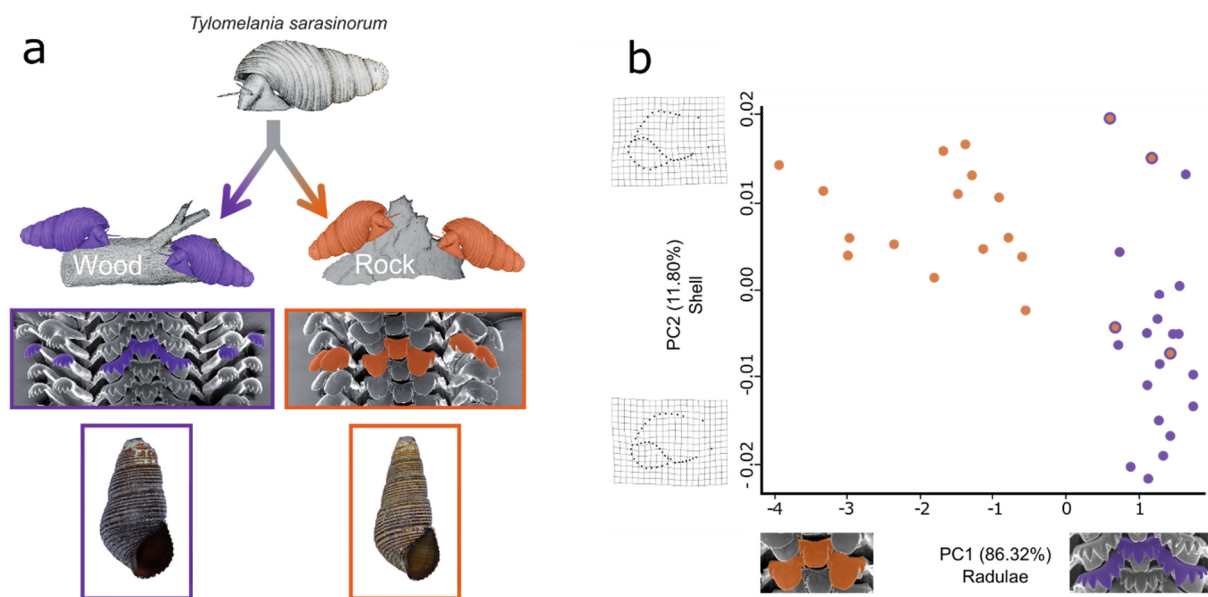

**Fig. 2: Habitat-correlated radula polymorphism in *T. sarasinorum*.** a) Hypothesis: Radulae of *T. sarasinorum* evolved in adaptation to different microhabitats, i.e. submerged logs and rocks giving rise to diverging ecomorphs. Subtle differences in shell shape and coloration likely also exist. b) Scatterplot based on the two principal components of shell and radula shape that differ significantly between wood (purple) and rock (orange) ecomorphs. Thin plate splines visualize shape change explained by PC2 of shell shape. The center of each dot indicates the habitat from which individuals were collected while the outer ring indicates to which ecomorph it was assigned based on SEM inspection of the radula. Individuals of both ecomorphs are associated with alternative substrates and clearly differ in radula tooth morphology. However, less pronounced, more gradual differences in shell shape also exist.

104 small proportion of shell shape variance (11.8%) (Suppl. tables 2, 3). Furthermore, shell  
105 morphospaces of both ecomorphs are largely overlapping along this axis (Figure 2b). Taken  
106 together our data support a habitat-correlated radula polymorphism in *T. sarasinorum*.

107 Consequently, *T. sarasinorum* ecomorphs represent a promising model to study the molecular  
108 basis of radula disparity and its role for lineage divergence in adaptive radiations of  
109 *Tylomelania*.

110

### 111 **Transcriptome sequencing and assembly**

112 To gain insight into transcriptomic divergence of sympatric *T. sarasinorum* ecomorphs, we  
113 pooled tissues from four to five individuals and conducted RNAseq on four biological replicates  
114 of each mantle, radula formative tissue (Suppl. figure 1) and foot tissue from both ecomorphs.  
115 A single transcriptome was assembled from combined data of both ecomorphs. Removal of  
116 genes with low expression and clustering of sequences with high sequence similarity (>97%)  
117 reduced the number of contigs with gene status (assigned by Trinity) from 478,661 to 156,685  
118 and increased N50 from 613 bp to 1229 bp (Table 1). Importantly, filtering did not affect  
119 assembly completeness (89%) based on a search for 843 conserved metazoan single-copy  
120 orthologs using BUSCO<sup>42</sup>, but decreased the rate of duplicated single copy orthologs from  
121 9.4% to 7.5% (Table 1). Since N50, completeness and duplication rate are well within the range  
122 of recently published mollusk transcriptomes<sup>43,44</sup>, this assembly was used to analyze  
123 transcriptomic divergence between ecomorphs of *T. sarasinorum*. Only three out of four  
124 biological replicates were used in the subsequent analyses after pool1 of either ecomorph was  
125 identified as outlier in initial gene expression analyses (Suppl. figure 3)<sup>45</sup>.

**Table 1:** Assembly statistics of the raw and filtered assembly

|                              | <b>Trinity<br/>genes</b> | <b>GC<br/>(in %)</b> | <b>'gene'<br/>N50</b> | <b>Complete<sup>a</sup><br/>(in %)</b> | <b>Duplicated<sup>a</sup><br/>(in %)</b> |
|------------------------------|--------------------------|----------------------|-----------------------|----------------------------------------|------------------------------------------|
| <b>Raw<br/>assembly</b>      | 478 661                  | 45.2                 | 613                   | 89                                     | 9.4                                      |
| <b>Filtered<br/>assembly</b> | 156 685                  | 44.9                 | 1 229                 | 89                                     | 7.5                                      |

<sup>a</sup> According to BUSCO

126 **Transcriptome wide SNP data indicates divergence of *T. sarasinorum***  
 127 **ecomorphs**

128 Lineage diversification in adaptive radiations of *Tylomelania* was hypothesized to be promoted  
 129 by radula diversification in adaptation to alternative substrates<sup>31,32</sup>. Hence, we investigated  
 130 whether sympatric radula morphs of *T. sarasinorum* with different habitat preferences  
 131 represent diverging evolutionary lineages. To this end, population genetic analyses were  
 132 carried out with PoPoolation2<sup>46</sup> using a uniform coverage of 20x and 10% minor allele  
 133 frequency (MAF) for SNP detection. In a total of 39,631,840 bases that passed the filtering  
 134 steps, 517,825 putative SNPs could be identified. Of these putative SNPs, 6,366 SNPs (1.2%)  
 135 in 2,572 transcripts (7.8% of all transcripts with putative SNPs) qualified as alternatively fixed  
 136 between ecomorphs ( $F_{st} = 0$  in all within-morph comparisons and  $F_{st} = 1$  in all across-morph  
 137 comparisons). Figure 3a depicts pairwise genetic differentiation between all pools, while Figure  
 138 3b shows the SNP-wise  $F_{st}$  distribution between both ecomorphs. Although the majority of  
 139 genetic variation is shared between populations of both radula morphs at Loeha Island (median  
 140  $F_{st} = 0.14$ ; mean  $F_{st} = 0.23$ ), we observed an excess of highly differentiated loci and consistently  
 141 higher  $F_{st}$  between pools of different ecomorphs (Figure 3). While median  $F_{st}$  in pairwise

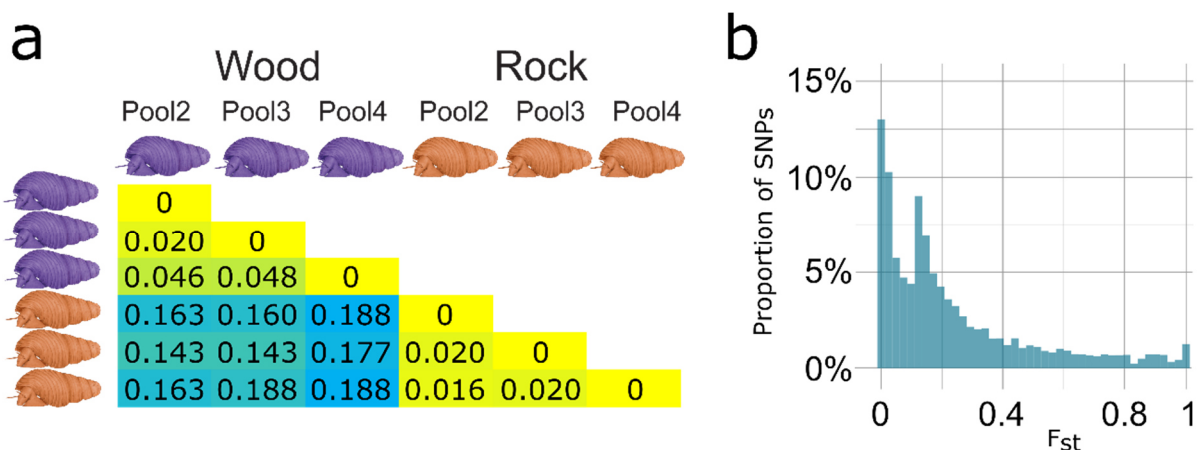

**Fig. 3: Divergence of *Tylomelania sarasinorum* ecomorphs.** a) For all pairwise comparisons of pools from wood (violet) and rock (orange), differentiation measured as median SNP-wise  $F_{st}$ , is depicted. The degree of differentiation from low to high is indicated by color change from yellow to blue. b) Distribution of SNP wise  $F_{st}$  between different ecomorphs for 517,852 putative SNPs (60x (20x per pool) minimum coverage, 10% MAF, all pools of each ecomorph combined). While some SNPs exhibit high differentiation, the majority of variation is shared among both ecomorphs.



142 comparisons among pools of similar ecomorphs ranged from 0.016 to 0.048, it ranged from  
143 0.143 to 0.188 among pools of different ecomorphs. Accordingly, our transcriptome-wide SNP  
144 data indicate evolutionary divergence of sympatric radula morphs of *T. sarasinorum* at Loeha  
145 Island. Although the  $F_{st}$  distribution indicates high differentiation of a few genomic regions in a  
146 background of shared genetic variation, pooled transcriptomic data does not allow to reliably  
147 distinguish between potential scenarios that may have given rise to this pattern. One possibility  
148 that could give rise to such patterns is divergence with gene flow<sup>47,48</sup>. During divergence with  
149 gene flow, a few loci under selection become fixed whereas genomic variation at sites of the  
150 genome that are not in strong linkage with selected loci are homogenized by gene flow, as  
151 long as reproductive isolation remains incomplete<sup>47,48</sup>. In fact, individuals with intermediate  
152 phenotypes and non-resolving phylogenies from mitochondrial markers indicate that gene flow  
153 may not only exist between ecomorphs, but even among *T. sarasinorum* and other species<sup>34,49</sup>.  
154 However, other scenarios like divergence without gene flow combined with selective sweeps,  
155 potentially following secondary contact, may result in similar patterns, albeit with increased  
156 absolute divergence in regions that are not linked to outlier loci. Genomic data comprising  
157 individuals from other sites and ideally other species would be required to investigate  
158 population history and gene-flow among divergent lineages to decide between alternative  
159 explanations.

160

## 161 **Ecomorphs differ in gene expression across all investigated tissues**

162 Regulatory evolution resulting in divergent gene expression plays a key role in adaptation and  
163 speciation<sup>29,50</sup>. Although gene expression is known to be highly tissue dependent, our  
164 knowledge of tissue-specific transcriptomic divergence is still in its infancy<sup>28,51</sup>. To shed light  
165 on gene expression divergence between *T. sarasinorum* ecomorphs, gene expression of foot  
166 tissue, shell forming mantle and radula forming tissue of both ecomorphs was analyzed using  
167 the pipeline included in Trinity v2.1.1<sup>52,53</sup>.

168

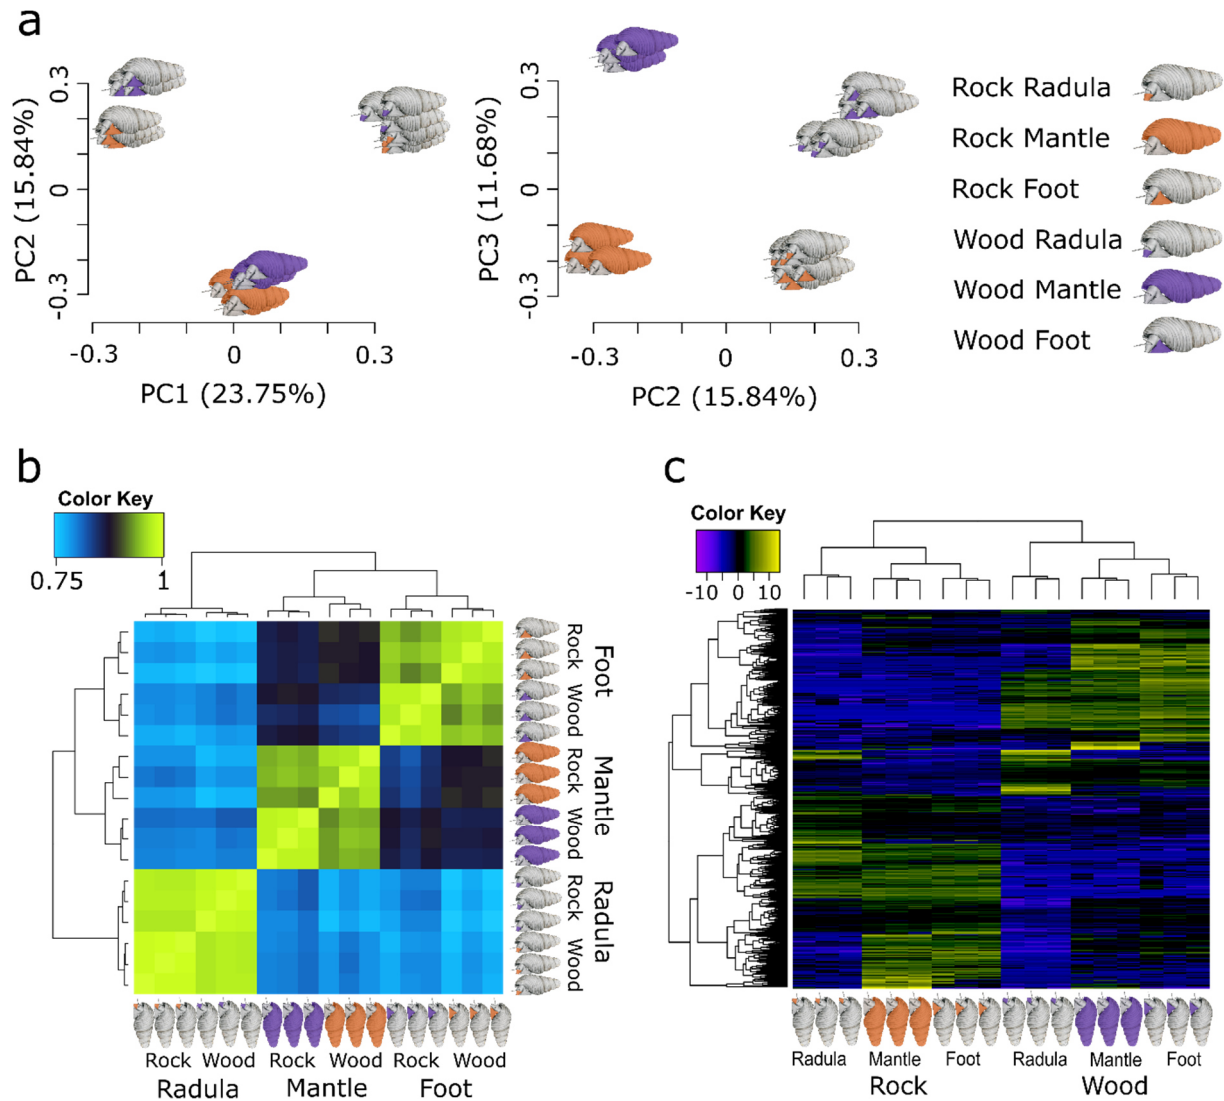

**Fig. 4: Divergence of gene expression between *T. sarsinorum* ecomorphs.** a) depicts a principal component analysis (PCA) of gene expression in radula, mantle and foot tissue from wood (violet) and rock (orange) ecomorphs. The first and second principal components (PCs) primarily separate different tissue types, while the third PC separates tissues derived from different ecomorphs. b) Hierarchically clustered Spearman correlation matrix of gene expression (log<sub>2</sub> transformed CPM). Samples with more similar gene expression cluster together in the matrix and the hierarchical clustering tree (left and top) and are colored yellow in the heatmap. c) shows differentially expressed genes between identical tissues of both ecomorphs. Genes are displayed as horizontal lines across samples (columns) in a heatmap of hierarchically clustered, highly differentially expressed ( $p \leq 10^{-10}$ ,  $FC \geq 4$ ) genes between identical tissues of wood (violet) and rock (orange). Genes with similar expression across samples cluster together in the hierarchical clustering tree on the left, while samples with similar gene expression cluster together in the clustering tree on the top. Overexpressed genes in a sample are colored yellow in the heatmap, while underexpressed genes are displayed in blue.

170 In accordance with previous work, foot and mantle form sister clusters to the exclusion of the  
171 radula cluster and biological replicates cluster tightly together in both PCA and hierarchical  
172 clustering, i.e., without a priori assumptions concerning group affiliation (Figure 4a,b)<sup>45</sup>. Within  
173 tissues, samples of different ecomorphs form separate clusters, indicating divergence in gene  
174 expression across all investigated tissues (Figure 4a, b). Finally, we analyzed genes that are  
175 highly differentially expressed between identical tissues of both ecomorphs (false discovery  
176 rate (FDR)  $\leq 10^{-10}$ ; fold change (FC)  $\geq 4$ ; Figure 4c). Although overall fewer genes are  
177 expressed in the radula than in the other two tissues, more genes are highly differentially  
178 expressed between the radula forming tissues ( $n = 536$ , 0.81% of genes that are expressed in  
179 at least one radula tissue) than between mantle ( $n = 436$ , 0.34%) or foot tissues ( $n = 424$ ,  
180 0.42%) of the two ecomorphs. Stronger morphological disparity in the radula compared to the  
181 two other tissues is thus mirrored by more pronounced differences in gene expression, which  
182 indicates that regulatory evolution contributes to morphological radula disparity.

183

#### 184 **Elevated divergence of radula transcriptomes supports the radula's role as key** 185 **adaptive trait**

186 Selection experiments have shown that strong selection can result in rapid tissue-specific  
187 transcriptomic divergence<sup>54</sup>. We thus hypothesized that if diversifying selection on the radula  
188 drove divergence of *T. sarasinorum* ecomorphs, divergence of the radula transcriptome would  
189 be stronger than transcriptomic divergence of other tissues. To further investigate the  
190 contribution of changes in gene regulation and protein coding sequences to radula evolution,  
191 we determined tissue-wise transcriptomic divergence in both gene expression and coding  
192 sequences.

193 Divergence in gene expression was measured as the proportion of highly differentially  
194 expressed genes (FDR  $\leq 10^{-10}$ ) between the same tissue types of both ecomorphs. In this  
195 context, genes which are universally differentially expressed across all sampled tissues are  
196 uninformative and were excluded from the analysis. We found that divergence in gene

197 expression is significantly higher in the radula than in the mantle (97% higher;  $p < 10^{-5}$ ; Fisher's  
 198 exact test) and in foot (85% higher;  $p < 10^{-5}$ ), while no significant difference exists between the  
 199 latter two (6% higher in foot,  $p = 0.42$ ) (Figure 5a). The radula also has the highest proportion  
 200 of highly differentially expressed genes at lower false discovery rates (e.g.  $FDR \leq 10^{-100}$ ). Only  
 201 when the criteria for DE genes are relaxed and higher false discovery rates are accepted, foot  
 202 gains the highest rate of differentially expressed genes ( $FDR \leq 10^{-5}$ : radula vs. mantle: 3,5%  
 203 higher in the radula,  $p = 0.42$ ; foot vs radula: 15,5% higher in foot,  $p < 10^{-5}$ ; foot vs mantle:  
 204 19,5% higher in foot,  $p < 10^{-5}$ ).

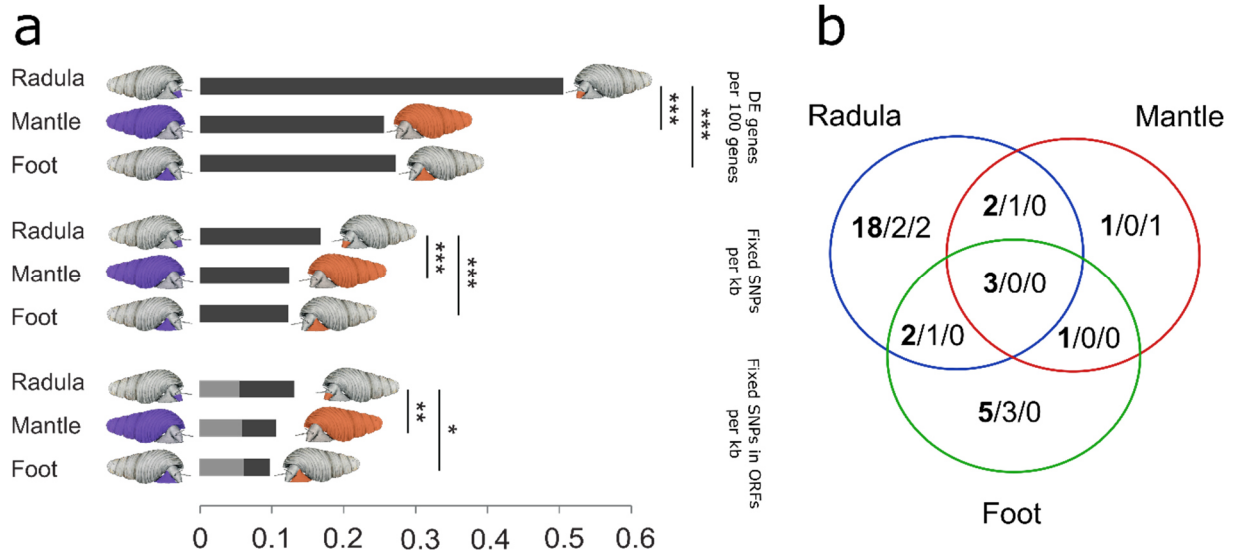

**Fig. 5: Tissue-wise transcriptomic divergence of *Tyломelania sarasinorum* ecomorphs.** The proportion of highly differentially expressed (DE) genes between rock and wood ecomorphs, frequency of alternatively fixed SNPs, and frequency of such SNPs in ORFs (black = synonymous; grey = non-synonymous) is shown for genes expressed in each tissue separately. For the proportion of alternatively fixed SNPs, only genes that are expressed ( $FPKM \geq 1$ ) in the respective tissue, but are not expressed across all tissues are included. Similarly, only genes that are not differentially expressed between ecomorphs across all tissues were considered for tissue-wise rates of differentially expressed genes. Significant differences between tissues are indicated by asterisks (\* =  $p \leq 0.05$ ; \*\* =  $p \leq 0.01$ ; \*\*\* =  $p \leq 0.001$ ). Divergence in both gene sequences and gene expression is significantly higher in genes that are expressed in the radula. b) Venn graph illustrating the position of alternatively fixed SNPs in genes that are also highly differentially expressed between at least one pair of identical tissues of both ecomorphs. The total number of SNPs in highly DE genes is shown first and in bold, followed by the number of synonymous and non-synonymous SNPs in these genes. The majority of alternatively fixed SNPs lie outside of ORFs and are found in genes that are only highly differentially expressed between radula forming tissues.

205 Similar to the proportion of differentially expressed genes, the frequency of alternatively fixed  
206 SNPs in transcripts of genes that were not expressed across all tissues (FPKM < 1, i.e. less  
207 than one mapped fragment per kilobase of transcript per million mapped reads, in all biological  
208 replicates of one tissue) is significantly higher in the radula than in mantle (~ 34.4% higher in  
209 radula,  $p < 10^{-5}$ ) or foot (36.6% higher in radula,  $p < 10^{-5}$ ), but does not differ significantly  
210 between the latter two (1.6% higher in mantle,  $p = 0.84$ ) (Figure 5a). This pattern remains  
211 unchanged when only alternatively fixed SNPs within open reading frames (ORFs) are  
212 considered (radula vs mantle: 23.4% higher in radula,  $p = 0.036$ ; radula vs foot: 34.7% higher  
213 in radula,  $p = 0.005$ ; mantle vs foot: 9.2% higher in mantle,  $p = 0.30$ ). No significant differences  
214 among tissues were found when the analysis was restricted to non-synonymous, alternatively  
215 fixed SNPs (radula vs. mantle: 6.5% higher in mantle,  $p = 0.72$ ; radula vs foot: 11.3% higher  
216 in foot,  $p = 0.51$ ; mantle vs foot: 4.5% higher in foot,  $p = 0.65$ ) (Figure 5a). Finally, when both  
217 datasets were combined, the majority of genes with alternatively fixed SNPs that were also  
218 highly differentially expressed between ecomorphs were only highly differentially expressed  
219 between the radula tissues (Figure 5b, but see suppl. figure 4 for lower DE threshold).

220 Our findings indicate that both the rate of highly differentially expressed genes and the  
221 frequency of alternatively fixed SNPs are significantly higher in genes expressed in the radula,  
222 compared to genes expressed in the other investigated tissues, which is in accordance with  
223 stronger diversifying selection on the radula transcriptome. An alternative explanation for a  
224 higher rate of differentially expressed genes in the radula would be that the possibility for more  
225 precise sampling of radula forming tissue reduces noise in gene expression data, which favors  
226 the detection of differentially expressed genes. However, higher sequence divergence of the  
227 radula transcriptomes cannot be explained in a similar fashion. Hence, tissue-specific patterns  
228 of transcriptomic divergence add support to the hypothesis that diversifying selection on the  
229 radula in the course of adaptation to alternative substrates promotes lineage diversification in  
230 the adaptive radiations of *Tylomelania*<sup>31</sup>.

231 Although genes expressed in the radula exhibited significantly higher sequence divergence  
232 compared to mantle and foot, no significant differences were detected for non-synonymous

233 mutations (Figure 5a). Sequence divergence outside of ORFs may reflect divergent non-  
234 coding RNAs or untranslated regions of protein coding transcripts, both of which can be linked  
235 to post-transcriptional regulation<sup>55,56</sup>. Overall, regulatory evolution appears to dominate  
236 divergence of *Tylomelania* ecomorphs as indicated by highly divergent gene expression across  
237 all tissues, which is most pronounced between radulae and higher divergence in untranslated  
238 than translated regions, both in general and in transcripts of highly DE genes (Figure 5a,b).  
239 These findings are in accordance with the expectation that the relative contribution of protein  
240 coding evolution to phenotypic disparity ceases over time, because selection favors regulatory  
241 change that can avoid deleterious pleiotropic effects<sup>39,40</sup>. Additionally, our results suggest that  
242 divergence of ecomorphs is likely polygenic, which is in line with results from other study  
243 systems. For example, regulatory evolution contributed to ecological divergence in East  
244 African cichlids, Darwin's finches and sticklebacks<sup>2,18,21,57</sup>, and polygenic selection gave rise  
245 to convergent gene expression in lake whitefish radiations in Europe and North America<sup>29</sup>.

246

## 247 **Functional enrichment of differentially expressed genes hints at tetrapyrrole** 248 **synthesis underlying shell color disparity**

249 To gain insight into dominant molecular functions (MF), cellular components (CC) and  
250 biological processes (BP) in genes contributing to divergence between ecomorphs, transcripts  
251 were functionally annotated with the Trinotate annotation pipeline (<https://trinotate.github.io/>)  
252 and gene ontology (GO) enrichment analyses were carried out with GOseq<sup>58</sup>. Similar to  
253 previously published mollusk transcriptomes<sup>43,45</sup>, only a minority of transcripts could be  
254 annotated (n = 29,139; 19 %) and GO terms were assigned to 13% (n = 20,864) of all  
255 sequences in the final assembly. The only enriched GOs among all transcripts with  
256 alternatively fixed SNPs were the BP term "biological process" and the CC term "cellular  
257 component", indicating that non-synonymous SNPs accumulated in transcripts with unknown  
258 functions. In contrast, highly differentially expressed genes between identical tissues of the  
259 two ecomorphs were enriched in multiple MF (n = 9) including "carbohydrate binding", "heme

260 binding" and "tetrapyrrole binding" (Suppl. table 5). The enriched GO-term "carbohydrate  
261 binding" is unsurprising within this context, because the radula is primarily made up of the  
262 polysaccharide chitin and proteoglycans are important constituents of the molluscan shell<sup>59</sup>. In  
263 contrast, implications of the enriched MF "heme binding" and "tetrapyrrole binding" are not as  
264 obvious. Interestingly, tetrapyrroles are important molluscan shell pigments<sup>60,61</sup> and  
265 synthesized in the heme pathway<sup>62</sup>. Tetrapyrrole binding genes that were differentially  
266 expressed between ecomorphs are primarily expressed in the shell building mantle and foot  
267 of the rock morph and mostly differentially expressed between the mantle tissues of both  
268 ecomorphs (Suppl. figure 5). Although further investigations targeting color differences  
269 between *T. sarasinorum* ecomorphs are needed, enrichment of these functions suggests that  
270 differential gene expression in the tetrapyrrole synthesis pathway in the mantle may underlie  
271 shell color differences between the ecomorphs.

272

### 273 **Candidate genes for radula disparity include cell-cell signaling genes involved** 274 **in craniofacial diversification in vertebrate radiations**

275 To investigate individual genes that contributed to radula diversification, two non-overlapping  
276 sets of candidate genes were generated based on i) differential expression and ii) non-  
277 synonymous protein coding sequence divergence. Genes that were highly differentially  
278 expressed between the radulae of the two ecomorphs ( $FDR \leq 10^{-10}$ ;  $FC \geq 4$ ), but not  
279 differentially expressed ( $FDR \geq 10^{-5}$ ;  $FC \leq 4$ ) between mantles or foot tissues, were chosen as  
280 expression-based candidate genes ( $n = 230$ ). The second set of candidate genes ( $n = 538$ )  
281 was composed of genes that were expressed in the radula of both ecomorphs and carried  
282 alternatively fixed non-synonymous SNPs. To further narrow down the list of candidates, we  
283 focused on genes involved in gene regulation and cell-cell signaling, because both regulatory  
284 as well as protein coding evolution of these genes may determine when and where radula  
285 tooth matrix is secreted.

286 While most genes with alternatively fixed non-synonymous SNPs only had one such SNP  
287 (66%), a maximum of 12 such SNPs (and 10 synonymous) was found in Rho GTPase  
288 activating protein 21 (*rhg21*) (Suppl. figure 6). Rho GTPase activating proteins are important  
289 activators of Rho family GTPase signaling. Rho family GTPase signaling interacts with notch  
290 signaling and regulates various cellular functions, including cytoskeletal reorganization in  
291 response to extracellular stimuli<sup>63–66</sup>. Coordinated reorganization of the cytoskeleton is  
292 particularly interesting with respect to the radula polymorphism of *T. sarasinorum*, because  
293 odontoblasts undergo pronounced shape changes during radula tooth secretion, and  
294 modification of their cell shape likely influences tooth morphology<sup>36</sup>. In addition to changing  
295 odontoblast cell shapes, modified cytoskeletons may change the localization of chitin synthesis  
296 via altered actin filament guidance of a lophotrochozoan-specific chitin synthase with a myosin  
297 head<sup>67</sup> that is expressed in radula forming tissue<sup>45</sup>. The number of non-synonymous  
298 alternatively fixed SNPs per kb of ORF in *rhg21* corresponds to a 32.2-fold and 2.37-fold  
299 increase in frequency of such SNPs compared to the average of all transcripts in the analysis  
300 and all transcripts with alternatively fixed SNPs, respectively. Unless mutation rates of genes  
301 like *rhg21* are substantially increased, their alleles diverged before the divergence of *T.*  
302 *sarasinorum* ecomorphs and either persisted as standing genetic variation, or were  
303 introgressed from different lineages. Gene flow among diverging lineages and even  
304 introgression from more distantly related species is common in adaptive radiations and may  
305 generate and maintain genetic variation at loci underlying adaptive traits<sup>2,18,20,21,23,24,68–72</sup>. Since  
306 previous studies indicate abundant hybridization among species of *Tylomelania*<sup>31,34</sup>,  
307 extraordinary divergence of a few genes like *rhg21* between *T. sarasinorum* ecomorphs  
308 (Suppl. figure 6) indicates that selection on highly divergent introgressed alleles may also  
309 contribute to lineage divergence in adaptive radiations of *Tylomelania*. Genomic data from  
310 across the radiation could be used to test this hypothesis, which, if confirmed, would add further  
311 support to a combinatorial view on speciation and adaptive radiation (reviewed in <sup>73</sup>).  
312 SNP-based candidates further included a transcript that was annotated as *neurogenic notch*  
313 *locus 1* (*notch1*) and a transcript encoding strawberry notch (1 non-syn; 5 syn), whose role in



314 the notch signaling pathway is still unclear<sup>74</sup>. A putative homolog of *notch1* was also found  
315 among the expression-based candidate genes, together with the morphogen *hedgehog* (*hh*).  
316 Both the notch and the hedgehog signaling pathway are conserved across the bilaterians and  
317 interact during developmental tissue patterning<sup>75,76</sup>. Interestingly, the hedgehog signaling  
318 pathway mediates both fixed as well as phenotypically plastic effects on jaw morphology in  
319 East African cichlids<sup>77-79</sup>. Hedgehog (*hh*) further regulates bone morphogenetic protein (BMP)  
320 expression in several metazoan lineages<sup>76,80,81</sup> and regulatory evolution resulting in divergent  
321 expression of BMPs played a pivotal role for craniofacial diversity in both Darwin's finches and  
322 East African cichlids<sup>26,27,82,83</sup>. In *T. sarasinorum*, *hedgehog* (*hh*) is overexpressed in the radula  
323 of the rock morph and a BMP that is most similar to *gbb/BMP5-8* is only expressed (FPKM  $\geq$   
324 1) in the radula of the rock morph. The only homeobox gene found among candidate genes  
325 was annotated as *aristaless related homeobox protein* (*arx*) (4 non-syn; 2 syn). In our dataset,  
326 *arx* is only expressed in the radula tissue and carries four non-synonymous alternatively fixed  
327 SNPs. Similar to notch signaling, we previously found that *arx* likely plays an important role for  
328 radula formation<sup>45</sup>. Interestingly, two non-synonymous substitutions in the *aristaless-like*  
329 *homeobox 1 transcription factor* (*ALX1*), which has an important role for craniofacial  
330 development in vertebrates, promoted beak diversification in Darwin's finches<sup>21</sup>.  
331 In summary, we find that several close relatives and putative homologs of genes that  
332 contributed to diversification of beaks in Darwin's finches and/or jaws of East African cichlids  
333 might also be involved in the adaptive diversification of the radula. Although, given similar gene  
334 regulatory networks, evolutionarily relevant mutations are expected to accumulate in so-called  
335 hotspot genes<sup>39,40</sup>, the radula does not share the developmental basis that jaws and beaks  
336 have in common<sup>84</sup>. Nonetheless, our observations might be explained by a relatively restricted  
337 and highly conserved set of tissue patterning cell-cell signaling pathways<sup>85</sup> that contain a  
338 limited set of genes that have the potential to rapidly generate potentially adaptive  
339 morphological diversity without fatal pleiotropic effects<sup>39,40,76,86</sup>. While a large number of  
340 candidate genes in this study calls for further verification, our results indicate that diversification

341 of foraging organs in adaptive radiations might be achieved via a limited set of cell-cell  
342 signaling genes that are particularly prone to rapid adaptive diversification.

343

344

## 345 **Conclusions**

346 This study confirms habitat-correlated radula disparity in *T. sarasinorum*, shows evolutionary  
347 divergence of ecomorphs and corroborates the hypothesis that adaptive diversification of the  
348 radula drives lineage divergence in adaptive radiations of *Tylomelania*. Exceptional sequence  
349 divergence of some genes may be a sign of older, potentially introgressed, variation, but needs  
350 to be further investigated using population genomic data from other sites and including related  
351 species. More generally, our findings shed light on tissue-wise transcriptomic divergence and  
352 indicate that adaptive diversification can leave tissue-specific footprints. Finally, overlapping  
353 gene sets appear to underlie rapid adaptive diversification of foraging organs in radiations of  
354 fishes, birds and snails, which is an aspect that requires further investigation in the future to  
355 get a better understanding of the genetic mechanisms generating functional diversity within  
356 adaptive radiations.

357

358

## 359 **Materials and Methods**

### 360 **Specimen and tissue collection**

361 Adult specimens of *Tylomelania sarasinorum* were collected from submerged wood and rock  
362 substrates at the northern shore of Loeha Island (Lake Towuti, South Sulawesi, Indonesia;  
363 2.76075 S 121.5586 E). All snails were collected in close proximity to each other and kept in  
364 buckets filled with lake water for a few hours before they were dissected in the field. Tissue  
365 samples of radula forming tissue, mantle edge, and foot muscle were directly stored in  
366 RNAlater to ensure RNA preservation. Before any samples were pooled for RNA extractions,

367 radula forming tissue was separated from the rest of the radula (Suppl. figure 1) and radula  
368 morphs of all individuals were inspected using scanning electron microscopy.

369

### 370 **Morphological analyses**

371 Shell shape and radula meristic were assessed for a total of 37 adult specimens from the  
372 collection of the Natural History Museum Berlin (Suppl. figures 1, 7). Specimens were chosen  
373 from lots that had been sampled randomly by hand from wooden (n = 19) and rocky substrate  
374 (n = 18).

375 Variation in shell shape was quantified using landmark based geometric morphometrics  
376 methods. To this end, specimens were placed on sand-filled trays and photographed with the  
377 aperture facing upwards using a SatScan collection scanner (SmartDrive Limited). Eight  
378 landmarks were placed on the whorls and aperture (see Suppl. figure 7a for details). Round  
379 structures of the aperture and the first and second whorl were outlined by four sliding  
380 semilandmarks (Suppl. figure 7a). Landmarks were placed using the software tpsDIG2<sup>87</sup>.  
381 Differences in size and rotation were removed from the data with a Procrustes superimposition  
382 (gpagen function in the geomorph package<sup>88</sup>). A principal component analysis (PCA) was  
383 calculated on the Procrustes residuals using the plotTangentSpace function (r package  
384 geomorph<sup>88</sup>). T-tests were calculated for principle components that explained more than 5%  
385 of the total variance, to test for significant differences in shell shape between ecomorphs.

386 Radulae were dissected from the headfoot of the animals and surrounding tissue was digested  
387 with 500µl lysis buffer<sup>89</sup> and 10µl proteinase K at 55°C overnight. Afterwards, radulae were  
388 cleaned with ethanol and treated for 2 seconds in an ultrasound bath. Radulae were mounted  
389 on electron microscope stubs and sputter coating was carried out with the Quorum Q150RS  
390 Sputter Coater using the manufacturer's program number 2.

391 The number of teeth was counted and maximum width and total height of the central denticle  
392 as well as the total width of the rachis base were measured with the software ImageJ<sup>90</sup> (Suppl.  
393 figure 7b). Subsequently, ratios of central denticle width/total height and rachis width were  
394 calculated. A PCA was carried out with these ratios and the number of denticles of the rachis

395 (the central tooth). Two tailed t-tests were used to evaluate morphological differences between  
396 ecomorphs for each PC that explained more than 5% of the total variance.

397

### 398 **Sample preparation and sequencing**

399 Nineteen individuals of the *T. sarasinorum* wood morph were grouped into three pools of five  
400 and one pool of four individuals (data already used in<sup>45</sup>), and 20 individuals of the *T.*  
401 *sarasinorum* rock morph were grouped into four pools of five individuals. Tissue samples of  
402 individuals in each pool were weighed (Mettler AT 261 scale), and similar amounts of each  
403 individual were pooled, resulting in four biological replicates of each tissue. Tissue was  
404 homogenized with a Precellys Minilyls, and total RNA was extracted using two alternative  
405 protocols. Since larger amounts of foot tissue were available, RNA was extracted from foot  
406 muscle with a TRIzol® extraction according to the manufacturer's protocol. However, to extract  
407 RNA from minute amounts of radula formative tissue and mantle edge, a customized protocol  
408 of the RNeasy Plus Micro Kit (Qiagen) was employed<sup>45</sup>. Briefly, remaining tissue fragments  
409 were digested with proteinase K following mechanical homogenization. Subsequently, lysis  
410 buffer was added to allow efficient DNA removal with gDNA spin columns. Amount and quality  
411 of extracted total RNA was inspected using Agilent's 2100 Bioanalyzer. *Tylomelania*  
412 *sarasinorum* rRNA carries a "hidden break", which means that the 28S rRNA easily  
413 disintegrates into two smaller fragments. This led to a sharp 18S band, but a much reduced or  
414 lacking 28S rRNA peak in our samples. Hence, RNA integrity (RIN) estimates were not  
415 applicable. Nonetheless, samples showed no signs of degradation or DNA contamination.  
416 Messenger RNA was enriched with poly (A) capture using NEXTflex™ Poly (A) Beads, and  
417 strand-specific libraries were built using the NEXTflex™ Rapid Illumina Directional RNA-Seq  
418 Library Prep Kit (Bioo Scientific) with modifications suggested by Sultan et al. (2012). Quality  
419 and concentrations of libraries were evaluated using Agilent's 2100 Bioanalyzer and qPCR  
420 (Kapa qPCR High Sensitivity Kit). Libraries had average fragment sizes between 350-500 bp  
421 and were sequenced (150 bp, paired end) on an Illumina NextSeq sequencing platform at the  
422 Berlin Center for Genomics in Biodiversity research (BeGenDiv).

423

## 424 **Transcriptome assembly**

425 Raw sequences were trimmed with a quality threshold of 30, minimum read length of 25 bp,  
426 and all Ns were removed using sickle<sup>92</sup>. Adapter sequences were subsequently removed with  
427 cutadapt<sup>93</sup>, which generated a final dataset consisting of 941 million paired end reads (Suppl.  
428 table 5). Trinity v2.1.1<sup>52,53</sup> was run in strand-specific mode with a minimal transcript length of  
429 250 bp, in silico read normalization (max. read coverage = 50), and two-fold minimal kmer  
430 coverage to generate a single assembly of all tissues of both ecomorphs. Quality-filtered  
431 adapter trimmed reads of each sample were mapped to the transcriptome using bowtie2<sup>94</sup>,  
432 followed by abundance estimation with RSEM<sup>95</sup>. Since abundance of rRNA mostly reflects  
433 polyA capture success, ribosomal RNA (rRNA) was removed following identification with a  
434 BLAST search using 28S rRNA (*Brotia pagodula*; HM229688.1) and 18S rRNA (*Stenomelania*  
435 *crenulata*; AB920318.1) as query sequences. Pool1 mantle and pool1 radula of both  
436 ecomorphs were removed from further analyses after they were identified as outliers in  
437 principal component analysis (PCA) of log<sub>2</sub> transformed counts per million mapped reads  
438 (cpm) (Suppl. figure 3). The cause for this observation is likely a combination of lower yield of  
439 total RNA in the first extractions, which led to a decrease in library complexity, and deeper  
440 sequencing of pool1 (Suppl. table 5). A batch effect might also have contributed to this  
441 observation, because pool1 mantle and pool1 radula of both ecomorphs were sequenced  
442 separately from all other samples. The assembly was subsequently filtered by expression  
443 (FPKM  $\geq$  1, i.e. at least one mapped fragment per kilobase of transcript per million mapped  
444 reads), using a script provided in the Trinity pipeline. CD-HIT version 4.6<sup>96</sup> was used to cluster  
445 the longest isoforms of all “trinity genes” based on sequence similarity (97% sequence identity  
446 threshold; 90% minimum alignment coverage of the shorter sequence), and the longest  
447 transcript of each cluster was retained. Quality filtered, adapter trimmed reads of both  
448 ecomorphs were re-mapped to the remaining transcripts, and transcripts with very low  
449 expression (FPKM  $\leq$  1) were removed to create a final assembly. BUSCO v1.1b1<sup>42</sup>, was  
450 employed to generate estimates of transcriptome completeness, redundancy, and

451 fragmentation by searching for 843 known metazoan single copy orthologs. Since BUSCO  
452 indicated that transcriptome completeness was not negatively affected by the abovementioned  
453 filtering steps, the final assembly was chosen for further analyses.

454

### 455 **Gene expression analysis**

456 Gene expression analysis was performed using the pipeline included in Trinity v2.1.1<sup>52,53</sup>.  
457 Briefly, quality-filtered adapter-trimmed reads of each sample were mapped to the final  
458 assembly using bowtie2<sup>94</sup>, followed by abundance estimation with RSEM<sup>95</sup>. Differentially  
459 expressed genes (FDR  $\leq 10^{-5}$ ; FC  $\geq 4$ ) and highly differentially expressed genes (FDR  $\leq 10^{-10}$ ;  
460 FC  $\geq 4$ ) were determined for all pairwise morph and tissue comparisons using edgeR<sup>97</sup>.

461

### 462 **Annotation**

463 Transcripts in the final assembly were functionally annotated using the Trinotate annotation  
464 pipeline (v3.0.1). Results were imported into the Trinotate-SQLite database, and the  
465 annotation report was generated using default parameters. The identities of *T. sarasinorum*  
466 genes that are mentioned by name in this manuscript were further verified by searching  
467 proteins matching *T. sarasinorum* open reading frames in the UniProt database using BLASTX  
468 and manually inspecting alignments of the 10 best hits with an E-value of  $10^{-10}$  or lower for  
469 which the alignment covered at least 60% of the database sequence.

470

### 471 **Ecomorph divergence**

472 PoPoolation2<sup>46</sup> was used to gain insight into divergence of *T. sarasinorum* ecomorphs.  
473 Duplicate reads, reads that did not map as proper pairs, and low quality alignments (mapping  
474 quality  $< 20$ ) were removed from mappings using SAMtools v1.3<sup>98</sup> and Picard Tools  
475 (<http://broadinstitute.github.io/picard/>). Subsequently, mappings of different tissues of the  
476 same pool (same individuals) were merged. To reduce biases in SNP detection caused by  
477 variance in gene expression, a uniform coverage of 20x for each pool was generated by

478 subsampling mapped reads (without replacement) and removing all sites with a coverage  
479 <20x. SNPs were called at a minor allele frequency (MAF) of 10%, i.e. 12 calls in a total of 120  
480 calls per site across all six pools. SNPs with lower MAF were discarded to remove potential  
481 sequencing errors and uninformative SNPs<sup>99</sup>, which increases the accuracy of allele frequency  
482 estimations<sup>100</sup>. SNP-wise  $F_{st}$  was calculated for all pairwise comparisons between pools using  
483 PoPoolation2<sup>46</sup>. Median pairwise  $F_{st}$  were estimated from all SNPs for each pairwise  
484 comparisons of pools. Median  $F_{st}$  and SNP wise  $F_{st}$  distributions between ecomorphs were  
485 calculated based on combined pool-wise allele counts for which a .sync file with combined  
486 allele counts for each the rock and the wood morph were generated. This resulted in a  
487 coverage of 60x (3 pools x 20x coverage per ecomorph). MAF was retained at 10%.  
488 Synonymous and non-synonymous mutations were determined using the *syn-nonsyn-at-*  
489 *position.pl* script included in PoPoolation v1.2.2 based on the longest ORF per gene and using  
490 a merged mapping file combining read mappings of all pools. Although PoPoolation is not  
491 recommended for processing pooled transcriptome data, because expression differences  
492 between individuals and alleles may introduce additional variation compared to sequencing  
493 pooled DNA (Pool-Seq)<sup>46,100</sup>, similar approaches have successfully been employed in  
494 numerous studies<sup>54,101–104</sup>. Additionally, high repeatability among biological replicates in this  
495 study supports the validity of our approach.

496

### 497 **Estimating tissue-specific transcriptomic divergence**

498 To evaluate whether transcriptomic divergence between ecomorphs differed depending on the  
499 tissue, tissue-wise divergence in gene expression and coding sequences was determined. The  
500 proportion of genes that were highly differentially expressed between identical tissues of the  
501 ecomorphs ( $FDR \leq 10^{-10}$ ;  $FC \geq 4$ ) was calculated for each tissue. Genes that were highly  
502 differentially expressed between ecomorphs across all tissues were excluded from the  
503 analyses. Likewise, the frequency of alternatively fixed SNPs was determined for genes  
504 expressed ( $FPKM \geq 1$ ) in each tissue, excluding genes that were expressed across all tissues.  
505 Genes were regarded as expressed in a certain tissue when they were expressed ( $FPKM \geq 1$ )

506 in at least one pool of that tissue. Differences in the proportion of differentially expressed genes  
507 and in the frequency of alternatively fixed SNPs between tissues were evaluated using Fisher's  
508 exact test.

509

## 510 **Gene ontology enrichment**

511 Gene ontology (GO) enrichment analyses were carried out to determine dominant functions of  
512 genes with alternatively fixed non-synonymous SNPs and of all genes that were highly  
513 differentially expressed ( $FDR \leq 10^{-10}$ ;  $FC \geq 4$ ) between identical tissues of the two ecomorphs.  
514 For all transcripts in the final assembly, GO assignments and parental terms were extracted  
515 from the Trinotate annotation report using the script included in the Trinotate-2.0.2 pipeline.  
516 GOseq<sup>58</sup> was used to identify enriched GOs in genes that were differentially expressed  
517 between the same tissues of different ecomorphs against a background of all genes in the final  
518 assembly. Additionally, enriched gene ontologies were identified in genes with alternatively  
519 fixed non-synonymous SNPs against a background of all genes that had bases that passed  
520 the filtering for coverage in the PoPoolation pipeline. Significantly enriched gene ontologies  
521 with a false discovery rate  $FDR \leq 0.05$  were summarized and redundant terms were removed  
522 (allowed similarity: 0.5) with REVIGO<sup>105</sup>.

523

## 524 **Identification of candidate genes**

525 Alternatively fixed non-synonymous SNPs were used to identify candidate genes for adaptive  
526 divergence. Thresholds for outlier detection are always to some extent arbitrary and depend  
527 on the choice of MAF that is accepted as informative to detect patterns of selection<sup>99,103</sup>. In  
528 addition to demography and stronger purifying selection in the transcriptome resulting in  
529 different effective mutation rates<sup>106</sup>, core assumptions of models employed for pooled genomic  
530 data may be violated by a larger margin of error in allele frequency estimation from pooled  
531 RNA compared to pooled DNA due to variation in gene expression between individuals and  
532 even alleles<sup>100</sup>. Accordingly, previous studies based on pooled transcriptomic data mostly used



533 quantile based approaches for outlier detection<sup>101,103</sup>. We used the most conservative  
534 approach available to us and only chose alternatively fixed SNPs, i.e. SNPs with  $F_{st} = 0$  in all  
535 within-morph comparisons and  $F_{st} = 1$  in all across-morph comparisons (98.8% percentile).  
536 Genes that carried non-synonymous alternatively fixed SNPs and were expressed in both  
537 radula forming tissues were determined as candidate genes for radula divergence. Finally,  
538 genes that were highly differentially expressed between the radulae of the two ecomorphs  
539 ( $FDR \leq 10^{-10}$ ;  $FC \geq 4$ ), but not differentially expressed ( $FDR \geq 10^{-5}$ ;  $FC \leq 4$ ) between mantles  
540 or foot tissues, were collected as candidate genes for radula shape divergence.

541

542

#### 543 **Data availability**

544 Sequence data and additional information are available at the NCBI Sequence Read Archive  
545 (SRP134819, ###) and BioProject (BioProject ID: PRJNA437798; BioSample accessions:  
546 SAMN08685289 - SAMN08685300 and SAMN13841508 - SAMN13841519).

547

#### 548 **Acknowledgements**

549 We thank Isabelle Waurick and the BeGenDiv for assistance in the lab, and all members of the  
550 Hofreiter Lab, von Rintelen Lab and David Garfield for helpful discussions. LIPI (Indonesian  
551 Institute of Sciences) and RISTEK (Indonesian State Ministry of Research and Technology)  
552 kindly issued the permits to conduct research in Indonesia. We would further like to thank  
553 Ristiyanti M. Marwoto (Museum Zoologicum Bogoriense, LIPI, Cibinong) for her continuous  
554 support of the project. This work was financed by the German Research Council (DFG) (grant  
555 number: Ri 1738/9-1). The authors declare no conflict of Interest.

556

557

558

## 559 References

- 560 1. Seehausen, O. African cichlid fish: a model system in adaptive radiation research. *Proc. R.*  
561 *Soc. B Biol. Sci.* **273**, 1987–1998 (2006).
- 562 2. Berner, D. & Salzburger, W. The genomics of organismal diversification illuminated by adaptive  
563 radiations. *Trends Genet.* **31**, 491–499 (2015).
- 564 3. Grant, P. R. & Grant, B. R. Evolution of character displacement in Darwin's finches. *Science.*  
565 **313**, 224–226 (2006).
- 566 4. Schluter, D. *The Ecology of Adaptive Radiation*. (Oxford University Press, 2000).
- 567 5. Darwin, C. *On the Origin of the Species by Means of Natural Selection: Or, The Preservation of*  
568 *Favoured Races in the Struggle for Life*. (John Murray, 1859).
- 569 6. Baldwin, B. G. & Sanderson, M. J. Age and rate of diversification of the Hawaiian silversword  
570 alliance (Compositae). *Proc. Natl. Acad. Sci. U. S. A.* **95**, 9402–9406 (1998).
- 571 7. Pfaender, J., Schliewen, U. K. & Herder, F. Phenotypic traits meet patterns of resource use in  
572 the radiation of “sharpfin” sailfin silverside fish in Lake Matano. *Evol. Ecol.* **24**, 957–974  
573 (2010).
- 574 8. Martin, C. H., Erickson, P. A. & Miller, C. T. The genetic architecture of novel trophic  
575 specialists: higher effect sizes are associated with exceptional oral jaw diversification in a  
576 pupfish adaptive radiation. *Mol. Ecol.* **26**, 624–638 (2017).
- 577 9. Nagao, Y. *et al.* Distinct interactions of Sox5 and Sox10 in fate specification of pigment cells in  
578 medaka and zebrafish. *PLOS Genet.* **14**, e1007260 (2018).
- 579 10. Elmer, K. R. *et al.* Parallel evolution of Nicaraguan crater lake cichlid fishes via non-parallel  
580 routes. *Nat. Commun.* **5**, 1–8 (2014).
- 581 11. Kocher, T. D. Adaptive evolution and explosive speciation: The cichlid fish model. *Nat. Rev.*  
582 *Genet.* **5**, 288–298 (2004).
- 583 12. Pfaender, J., Hadiaty, R. K., Schliewen, U. K. & Herder, F. Rugged adaptive landscapes shape  
584 a complex, sympatric radiation. *Proc. R. Soc. London B* **283**, 20152342 (2016).
- 585 13. Tokita, M., Yano, W., James, H. F. & Abzhanov, A. Cranial shape evolution in adaptive  
586 radiations of birds: comparative morphometrics of Darwin's finches and Hawaiian  
587 honeycreepers. *Philos. Trans. R. Soc. B Biol. Sci.* **372**, 20150481 (2017).
- 588 14. Ferris, K. G., Barnett, L. L., Blackman, B. K. & Willis, J. H. The genetic architecture of local  
589 adaptation and reproductive isolation in sympatry within the *Mimulus guttatus* species complex.  
590 *Mol. Ecol.* **26**, 208–224 (2016).
- 591 15. Rogers, S. & Bernatchez, L. The genetic architecture of ecological speciation and the  
592 association with signatures of selection in natural lake whitefish (*Coregonus* sp. *Salmonidae*)

- 593 species pairs. *Mol. Biol. Evol.* **24**, 1423–1438 (2007).
- 594 16. Rogers, S. M., Xu, S. & Schlüter, P. M. Introduction: integrative molecular ecology is rapidly  
595 advancing the study of adaptation and speciation. *Mol. Ecol.* **26**, 1–6 (2017).
- 596 17. Salzburger, W. Understanding explosive diversification through cichlid fish genomics. *Nat. Rev.*  
597 *Genet.* **19**, 705–717 (2018).
- 598 18. Brawand, D. *et al.* The genomic substrate for adaptive radiation in African cichlid fish. *Nature*  
599 **513**, 375–381 (2014).
- 600 19. Dennenmoser, S., Vamosi, S. M., Nolte, A. W. & Rogers, S. M. Adaptive genomic divergence  
601 under high gene flow between freshwater and brackish-water ecotypes of prickly sculpin  
602 (*Cottus asper*) revealed by Pool-Seq. *Mol. Ecol.* **26**, 25–42 (2017).
- 603 20. Richards, E. & Martin, C. Adaptive introgression from distant Caribbean islands contributed to  
604 the diversification of a microendemic radiation of trophic specialist pupfishes. *PLoS Genet.* **13**,  
605 e1006919 (2017).
- 606 21. Almén, M. S. *et al.* Adaptive radiation of Darwin’s finches revisited using whole genome  
607 sequencing. *BioEssays* **38**, 14–20 (2016).
- 608 22. Dasmahapatra, K. K. *et al.* Butterfly genome reveals promiscuous exchange of mimicry  
609 adaptations among species. *Nature* **487**, 94–98 (2012).
- 610 23. Meier, J. I. *et al.* Ancient hybridization fuels rapid cichlid fish adaptive radiations. *Nat. Commun.*  
611 **8**, 14363 (2017).
- 612 24. Seehausen, O. Hybridization and adaptive radiation. *Trends Ecol. Evol.* **19**, 198–207 (2004).
- 613 25. Abzhanov, A. *et al.* The calmodulin pathway and evolution of elongated beak morphology in  
614 Darwin’s finches. *Nature* **442**, 563–567 (2006).
- 615 26. Abzhanov, A., Protas, M., Grant, B. R., Grant, P. R. & Tabin, C. J. Bmp4 and morphological  
616 variation of beaks in Darwin’s finches. *Science* **305**, 1462–1465 (2004).
- 617 27. Lawson, L. P. & Petren, K. The adaptive genomic landscape of beak morphology in Darwin’s  
618 finches. *Mol. Ecol.* **26**, 4978–4989 (2017).
- 619 28. Uebbing, S. *et al.* Divergence in gene expression within and between two closely related  
620 flycatcher species. *Mol. Ecol.* **25**, 2015–2028 (2016).
- 621 29. Rougeux, C., Gagnaire, P., Praebel, K., Seehausen, O. & Bernatchez, L. Polygenic selection  
622 drives the evolution of convergent transcriptomic landscapes across continents within a  
623 Nearctic sister-species complex. *Mol. Ecol. mec.*15226 (2019).
- 624 30. Kruimel, J. H. Verzeichnis der von Herrn E.C.Abandanon in Celebes gesammelten  
625 Süßwasser-Mollusken. *Bijdr. tot Dierkd.* **19**, 217–235 (1913).
- 626 31. von Rintelen, T., Wilson, A. B., Meyer, A. & Glaubrecht, M. Escalation and trophic

- 627 specialization drive adaptive radiation of freshwater gastropods in ancient lakes on Sulawesi,  
628 Indonesia. *Proc. R. Soc. London B* **271**, 2541–2549 (2004).
- 629 32. von Rintelen, T., von Rintelen, K. & Glaubrecht, M. The species flocks of the viviparous  
630 freshwater gastropod *Tylomelania* (Mollusca: Cerithioidea: Pachychilidae) in the ancient lakes  
631 of Sulawesi, Indonesia: The role of geography, trophic morphology and color as driving forces  
632 in adaptive radiation. in *Evolution in Action* (ed. Glaubrecht, M.) 485–512 (Springer, 2010).
- 633 33. von Rintelen, T. & Glaubrecht, M. Anatomy of an adaptive radiation: a unique reproductive  
634 strategy in the endemic freshwater gastropod *Tylomelania* (Cerithioidea: Pachychilidae) on  
635 Sulawesi, Indonesia and its biogeographical implications. *Biol. J. Linn. Soc.* **85**, 513–542  
636 (2005).
- 637 34. Glaubrecht, M. & von Rintelen, T. The species flocks of lacustrine gastropods: *Tylomelania* on  
638 Sulawesi as models in speciation and adaptive radiation. *Hydrobiologia* **615**, 181–199 (2008).
- 639 35. Hilgers, L., Grau, J. H., Pfaender, J. & von Rintelen, T. The complete mitochondrial genome of  
640 the viviparous freshwater snail *Tylomelania sarasinorum* (Caenogastropoda: Cerithioidea).  
641 *Mitochondrial DNA Part B* **1**, 389–390 (2016).
- 642 36. Mackenstedt, U. & Märkel, K. Experimental and comparative morphology of radula renewal in  
643 pulmonates (Mollusca, Gastropoda). *Zoomorphology* **107**, 209–239 (1987).
- 644 37. Padilla, D. K. Inducible phenotypic plasticity of the radula in *Lacuna* (Gastropoda: Littorinidae).  
645 *Veliger* **4**, 201–204 (1998).
- 646 38. Jensen, K. R. Morphological adaptations and plasticity of radular teeth of the Sacoglossa (=  
647 Ascoglossa) (Mollusca: Opisthobranchia) in relation to their food plants. *Biol. J. Linn. Soc.* **48**,  
648 135–155 (1993).
- 649 39. Stern, D. L. & Orgogozo, V. The loci of evolution: How predictable is genetic evolution?  
650 *Evolution (N. Y.)* **62**, 2155–2177 (2008).
- 651 40. Stern, D. L. & Orgogozo, V. Is genetic evolution predictable? *Science* **323**, 746–751 (2009).
- 652 41. von Rintelen, T., Bouchet, P. & Glaubrecht, M. Ancient lakes as hotspots of diversity: A  
653 morphological review of an endemic species flock of *Tylomelania* (Gastropoda: Cerithioidea:  
654 Pachychilidae) in the Malili lake system on Sulawesi, Indonesia. *Hydrobiologia* **592**, 11–94  
655 (2007).
- 656 42. Simão, F. A., Waterhouse, R. M., Ioannidis, P., Kriventseva, E. V. & Zdobnov, E. M. BUSCO:  
657 Assessing genome assembly and annotation completeness with single-copy orthologs.  
658 *Bioinformatics* **31**, 3210–3212 (2015).
- 659 43. Harney, E. *et al.* De novo assembly and annotation of the European abalone *Haliotis*  
660 *tuberculata* transcriptome. *Mar. Genomics* **28**, 11–16 (2016).
- 661 44. De Oliveira, A. L. *et al.* Comparative transcriptomics enlarges the toolkit of known  
662 developmental genes in mollusks. *BMC Genomics* **17**, 905 (2016).

- 663 45. Hilgers, L., Hartmann, S., Hofreiter, M. & von Rintelen, T. Novel genes, ancient genes, and  
664 gene co-option contributed to the genetic basis of the radula, a molluscan innovation. *Mol. Biol.*  
665 *Evol.* **35**, 1638–1652 (2018).
- 666 46. Kofler, R., Pandey, R. V. & Schlötterer, C. PoPoolation2: Identifying differentiation between  
667 populations using sequencing of pooled DNA samples (Pool-Seq). *Bioinformatics* **27**, 3435–  
668 3436 (2011).
- 669 47. Feder, J. L., Egan, S. P. & Nosil, P. The genomics of speciation-with-gene-flow. *Trends Genet.*  
670 **28**, 342–50 (2012).
- 671 48. Seehausen, O. *et al.* Genomics and the origin of species. *Nat. Rev. Genet.* **15**, 176–92 (2014).
- 672 49. von Rintelen, T. & Glaubrecht, M. New discoveries in old lakes: three new species of  
673 *Tylomelania* Sarasin & Sarasin, 1897 (Gastropoda: Cerithioidea: Pachychilidae) from the Malili  
674 lake system on Sulawesi, Indonesia. *J. Molluscan Stud.* **69**, 3–17 (2003).
- 675 50. Mack, K. L. & Nachman, M. W. Gene regulation and speciation. *Trends Genet.* **33**, 68–80  
676 (2017).
- 677 51. Alvarez, M., Schrey, A. W. & Richards, C. L. Ten years of transcriptomics in wild populations:  
678 What have we learned about their ecology and evolution? *Mol. Ecol.* **24**, 710–725 (2015).
- 679 52. Grabherr, M. G. *et al.* Full-length transcriptome assembly from RNA-Seq data without a  
680 reference genome. *Nat. Biotechnol.* **29**, 644–52 (2011).
- 681 53. Haas, B. J. *et al.* De novo transcript sequence reconstruction from RNA-seq using the Trinity  
682 platform for reference generation and analysis. *Nat. Protoc.* **8**, 1494–1512 (2013).
- 683 54. Konczal, M. *et al.* Genomic response to selection for predatory behavior in a mammalian model  
684 of adaptive radiation. *Mol. Biol. Evol.* **33**, 2429–2440 (2016).
- 685 55. Hughes, T. A. Regulation of gene expression by alternative untranslated regions. *Trends*  
686 *Genet.* **22**, 119–122 (2006).
- 687 56. Haygood, R., Babbitt, C. C., Fedrigo, O. & Wray, G. A. Contrasts between adaptive coding and  
688 noncoding changes during human evolution. *Proc. Natl. Acad. Sci. U. S. A.* **107**, 7853–7857  
689 (2010).
- 690 57. Jones, F. C. *et al.* The genomic basis of adaptive evolution in threespine sticklebacks. *Nature*  
691 **484**, 55–61 (2012).
- 692 58. Young, M. D., Wakefield, M. J., Smyth, G. K. & Oshlack, A. Gene ontology analysis for RNA-  
693 seq: Accounting for selection bias. *Genome Biol.* **11**, R14 (2010).
- 694 59. Liao, Z. *et al.* In-depth proteomic analysis of nacre, prism, and myostracum of *Mytilus* shell. *J.*  
695 *Proteomics* **122**, 26–40 (2015).
- 696 60. Williams, S. T. Molluscan shell colour. *Biol. Rev.* (2016).

- 697 61. Williams, S. T. *et al.* Colorful seashells: Identification of haem pathway genes associated with  
698 the synthesis of porphyrin shell color in marine snails. *Ecol. Evol.* (2017).
- 699 62. Hendry, G. A. & Jones, O. T. Haems and chlorophylls: comparison of function and formation. *J.*  
700 *Med. Genet.* **17**, 1 LP – 14 (1980).
- 701 63. Moon, S. Rho GTPase-activating proteins in cell regulation. *Trends Cell Biol.* **13**, 13–22 (2003).
- 702 64. Redmond, L. & Ghosh, A. The role of Notch and Rho GTPase signaling in the control of  
703 dendritic development. *Curr. Opin. Neurobiol.* **11**, 111–117 (2001).
- 704 65. Polacheck, W. J. *et al.* A non-canonical Notch complex regulates adherens junctions and  
705 vascular barrier function. *Nature* 1–22 (2017).
- 706 66. Vo, K. *et al.* Targeting notch pathway enhances rapamycin antitumor activity in pancreas  
707 cancers through PTEN phosphorylation. *Mol. Cancer* **10**, 138 (2011).
- 708 67. Zakrzewski, A. C. *et al.* Early divergence, broad distribution, and high diversity of animal chitin  
709 synthases. *Genome Biol. Evol.* **6**, 316–325 (2014).
- 710 68. Lamichhane, S. *et al.* Rapid hybrid speciation in Darwin’s finches. *Science* **4593**, eaao4593  
711 (2017).
- 712 69. Lamichhane, S. *et al.* A beak size locus in Darwins finches facilitated character displacement  
713 during a drought. *Science* **352**, 470–474 (2016).
- 714 70. Chaves, J. A. *et al.* Genomic variation at the tips of the adaptive radiation of Darwin’s finches.  
715 *Mol. Ecol.* **25**, 5282–5295 (2016).
- 716 71. Meier, J. I. *et al.* Demographic modelling with whole-genome data reveals parallel origin of  
717 similar *Pundamilia* cichlid species after hybridization. *Mol. Ecol.* 123–141 (2016).
- 718 72. Enciso-Romero, J. *et al.* Evolution of novel mimicry rings facilitated by adaptive introgression in  
719 tropical butterflies. *Mol. Ecol.* **26**, 5160–5172 (2017).
- 720 73. Marques, D. A., Meier, J. I. & Seehausen, O. A combinatorial view on speciation and adaptive  
721 radiation. *Trends Ecol. Evol.* **34**, 1–14 (2019).
- 722 74. Gazave, E. *et al.* Origin and evolution of the Notch signalling pathway: An overview from  
723 eukaryotic genomes. *BMC Evol Biol* **9**, 249 (2009).
- 724 75. Richards, G. S. & Degnan, B. M. The dawn of developmental signaling in the metazoa. *Cold*  
725 *Spring Harb. Symp. Quant. Biol.* **74**, 81–90 (2009).
- 726 76. Heller, E. & Fuchs, E. Tissue patterning and cellular mechanics. *J. Cell Biol.* **211**, 219–231  
727 (2015).
- 728 77. Roberts, R. B., Hu, Y., Albertson, R. C. & Kocher, T. D. Craniofacial divergence and ongoing  
729 adaptation via the hedgehog pathway. *Proc. Natl. Acad. Sci.* **108**, 13194–13199 (2011).
- 730 78. Hu, Y. & Albertson, R. C. Baby fish working out: An epigenetic source of adaptive variation in

- 731 the cichlid jaw. *Proc. R. Soc. B Biol. Sci.* **284**, 20171018 (2017).
- 732 79. Hu, Y. & Albertson, R. C. Hedgehog signaling mediates adaptive variation in a dynamic  
733 functional system in the cichlid feeding apparatus. *Proc. Natl. Acad. Sci.* **111**, 8530–8534  
734 (2014).
- 735 80. Rojas-Ríos, P., Guerrero, I. & González-Reyes, A. Cytoneme-mediated delivery of hedgehog  
736 regulates the expression of bone morphogenetic proteins to maintain germline stem cells in  
737 *Drosophila*. *PLoS Biol.* **10**, e1001298 (2012).
- 738 81. Cicconardi, F., Marcatili, P., Arthofer, W., Schlick-Steiner, B. C. & Steiner, F. M. Positive  
739 diversifying selection is a pervasive adaptive force throughout the *Drosophila* radiation. *Mol.*  
740 *Phylogenet. Evol.* **112**, 230–243 (2017).
- 741 82. Albertson, R. C. & Kocher, T. D. Genetic and developmental basis of cichlid trophic diversity.  
742 *Heredity (Edinb.)*. **97**, 211–221 (2006).
- 743 83. Albertson, R. C., Strelman, J. T. & Kocher, T. . D. Genetic basis of adaptive shape differences  
744 in the cichlid head. *J. Hered.* **94**, 291–301 (2003).
- 745 84. Fish, J. L. Evolvability of the vertebrate craniofacial skeleton. *Semin. Cell Dev. Biol.* (2017).
- 746 85. Pires-daSilva, A. & Sommer, R. J. The evolution of signalling pathways in animal development.  
747 *Nat. Rev. Genet.* **4**, 39–49 (2003).
- 748 86. Jiggins, C. D., Wallbank, R. W. R. & Hanly, J. J. Waiting in the wings: What can we learn about  
749 gene co-option from the diversification of butterfly wing patterns? *Philos. Trans. R. Soc. B* **372**,  
750 20150485 (2016).
- 751 87. Rohlf, F. J. (Department of E. and E. S. U. of N. Y. at S. B. TpsDig2. (2006).
- 752 88. Adams, D. C. & Otárola-Castillo, E. geomorph: an R package for the collection and analysis of  
753 geometric morphometric shape data. *Methods Ecol. Evol.* **4**, 393–399 (2013).
- 754 89. Holznagel, W. E. A nondestructive method for cleaning gastropod radulae from frozen, alcohol-  
755 fixed, or dried material. *Am. Malacol. Bull.* **14**, 181–183 (1998).
- 756 90. Rasband, W. . (U. S. N. I. of H. ImageJ.
- 757 91. Sultan, M. *et al.* A simple strand-specific RNA-Seq library preparation protocol combining the  
758 Illumina TruSeq RNA and the dUTP methods. *Biochem. Biophys. Res. Commun.* **422**, 643–646  
759 (2012).
- 760 92. Joshi, N. A. & Fass, J. N. Sickle: a sliding-window, adaptive, quality-based trimming tool for  
761 FastQ files. (2011).
- 762 93. Martin, M. Cutadapt removes adapter sequences from high-throughput sequencing reads.  
763 *EMBnet. J.* **17**, 10–12 (2011).
- 764 94. Langmead, B., Trapnell, C., Pop, M. & Salzberg, S. L. Ultrafast and memory-efficient alignment

- 765 of short DNA sequences to the human genome. *Genome Biol.* **10**, R25 (2009).
- 766 95. Li, B. & Dewey, C. N. RSEM: Accurate transcript quantification from RNA-Seq data with or  
767 without a reference genome. *BMC Bioinformatics* **12**, 323 (2011).
- 768 96. Li, W. & Godzik, A. Cd-hit: A fast program for clustering and comparing large sets of protein or  
769 nucleotide sequences. *Bioinformatics* **22**, 1658–1659 (2006).
- 770 97. Robinson, M. D., McCarthy, D. J. & Smyth, G. K. edgeR: A Bioconductor package for  
771 differential expression analysis of digital gene expression data. *Bioinformatics* **26**, 139–140  
772 (2009).
- 773 98. Li, H. *et al.* The sequence alignment/map format and SAMtools. *Bioinformatics* **25**, 2078–2079  
774 (2009).
- 775 99. Roesti, M., Salzburger, W. & Berner, D. Uninformative polymorphisms bias genome scans for  
776 signatures of selection. *BMC Evol. Biol.* **12**, 94 (2012).
- 777 100. Konczal, M., Koteja, P., Stuglik, M. T., Radwan, J. & Babik, W. Accuracy of allele frequency  
778 estimation using pooled RNA-Seq. *Mol. Ecol. Resour.* **14**, 381–392 (2014).
- 779 101. Kozak, G. M., Brennan, R. S., Berdan, E. L., Fuller, R. C. & Whitehead, A. Functional and  
780 population genomic divergence within and between two species of killifish adapted to different  
781 osmotic niches. *Evolution (N. Y.)*. **68**, 63–80 (2014).
- 782 102. Schlötterer, C., Tobler, R., Kofler, R. & Nolte, V. Sequencing pools of individuals — mining  
783 genome-wide polymorphism data without big funding. *Nat. Rev. Genet.* **15**, 749–763 (2014).
- 784 103. Westram, A. M. *et al.* Do the same genes underlie parallel phenotypic divergence in different  
785 *Littorina saxatilis* populations? *Mol. Ecol.* **23**, 4603–4616 (2014).
- 786 104. Al-Tobasei, R. *et al.* Identification of SNPs associated with muscle yield and quality traits using  
787 allelic-imbalance analyses of pooled RNA-Seq samples in rainbow trout. *BMC Genomics* **18**,  
788 1–15 (2017).
- 789 105. Supek, F., Bošnjak, M., Škunca, N. & Šmuc, T. Revigo summarizes and visualizes long lists of  
790 gene ontology terms. *PLoS One* **6**, (2011).
- 791 106. Charlesworth, B. Measures of divergence between populations and the effect of forces that  
792 reduce variability. *Mol. Biol. Evol.* **15**, 538–543 (1998).
- 793
